# Supplementary material for: Nanolipolee-007, a Novel Nanoparticle-Based Drug Containing Leelamine for the Treatment of Melanoma
Source: Oxford University Press journal article supplement (doi:10.1158/1535-7163.mct-14-0357), 2014-08-01
Supplement: 15357163mct140357-sup-130607_1_supp_2462642_n571kq.docx [file 15357163mct140357-sup-130607_1_supp_2462642_n571kq.docx]

| **Agents** | **1 mg/mL** | **2.5 mg/mL** | **5 mg/mL** | **7.5 mg/mL** |
| --- | --- | --- | --- | --- |
| Leelamine (Saline) | Insoluble | Insoluble | Insoluble | Insoluble |
| Liposomal leelamine | Soluble | Soluble | Soluble | Soluble |

**Supplemental Figure S1**

**
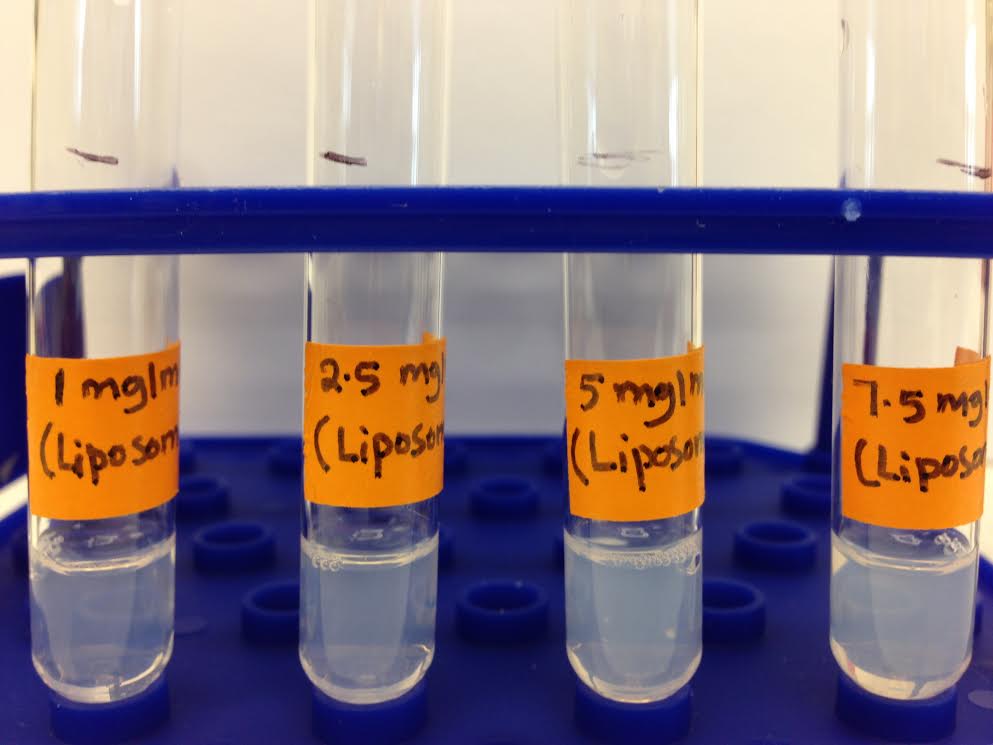

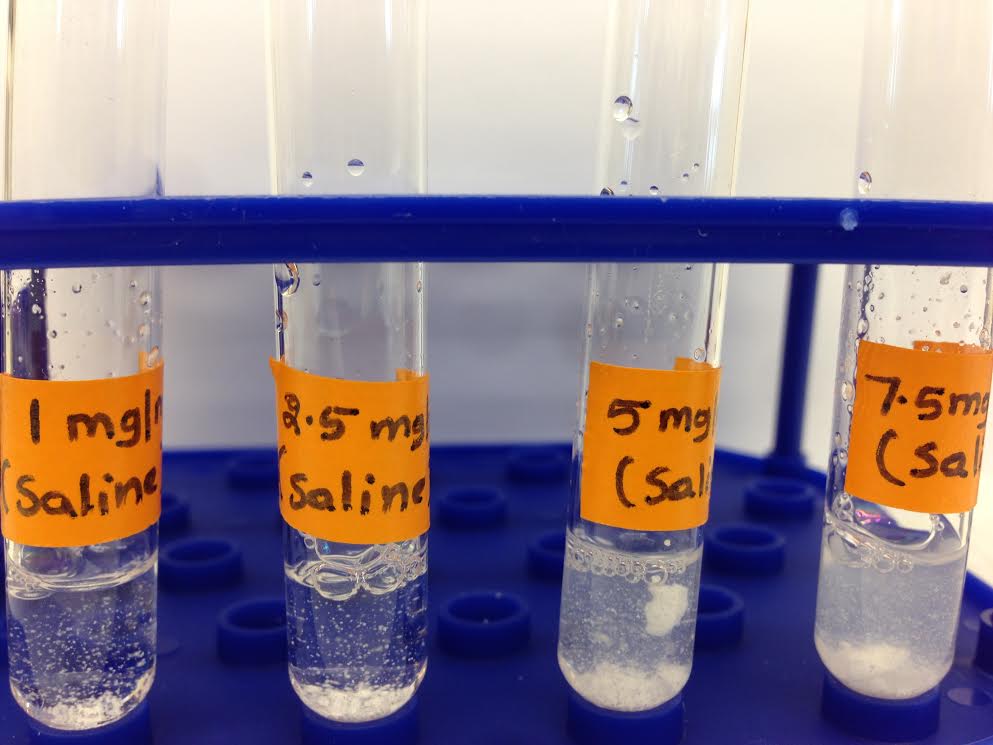
 Leelamine in Saline** **Liposomal leelamine**

*

*
