# Supplementary material for: Nanolipolee-007, a Novel Nanoparticle-Based Drug Containing Leelamine for the Treatment of Melanoma
Source: Oxford University Press journal article supplement (doi:10.1158/1535-7163.mct-14-0357), 2014-08-01
Supplement: 15357163mct140357-sup-130607_1_supp_2462649_n57xl3.doc [file 15357163mct140357-sup-130607_1_supp_2462649_n57xl3.doc]

Supplemental Table S1

| **Agents** | **Doses (mg/Kg body weight** | **Route of administration** | **Mortality with in 1 hour** | **Hemolysis & coagulation** |
| --- | --- | --- | --- | --- |
| Leelamine (in DMSO) | 30 | Intravenous (tail vein) | 3/3 | 3/3 |
| Liposomal leelamine | 30 | Intravenous (tail vein) | 0/3 | 0/3 |

**Supplemental Table S1.** Animal survival after the intravenous administration of 30 mg/Kg body weight leelamine (DMSO) and liposomal leelamine (Saline). Number of surviving animals or changes in hemolysis and vascular coagulation (n=3).
