# Supplementary material for: Nanolipolee-007, a Novel Nanoparticle-Based Drug Containing Leelamine for the Treatment of Melanoma
Source: Oxford University Press journal article supplement (doi:10.1158/1535-7163.mct-14-0357), 2014-08-01
Supplement: 15357163mct140357-sup-130607_1_supp_2462651_n57tl4.doc [file 15357163mct140357-sup-130607_1_supp_2462651_n57tl4.doc]

Supplemental Table S3


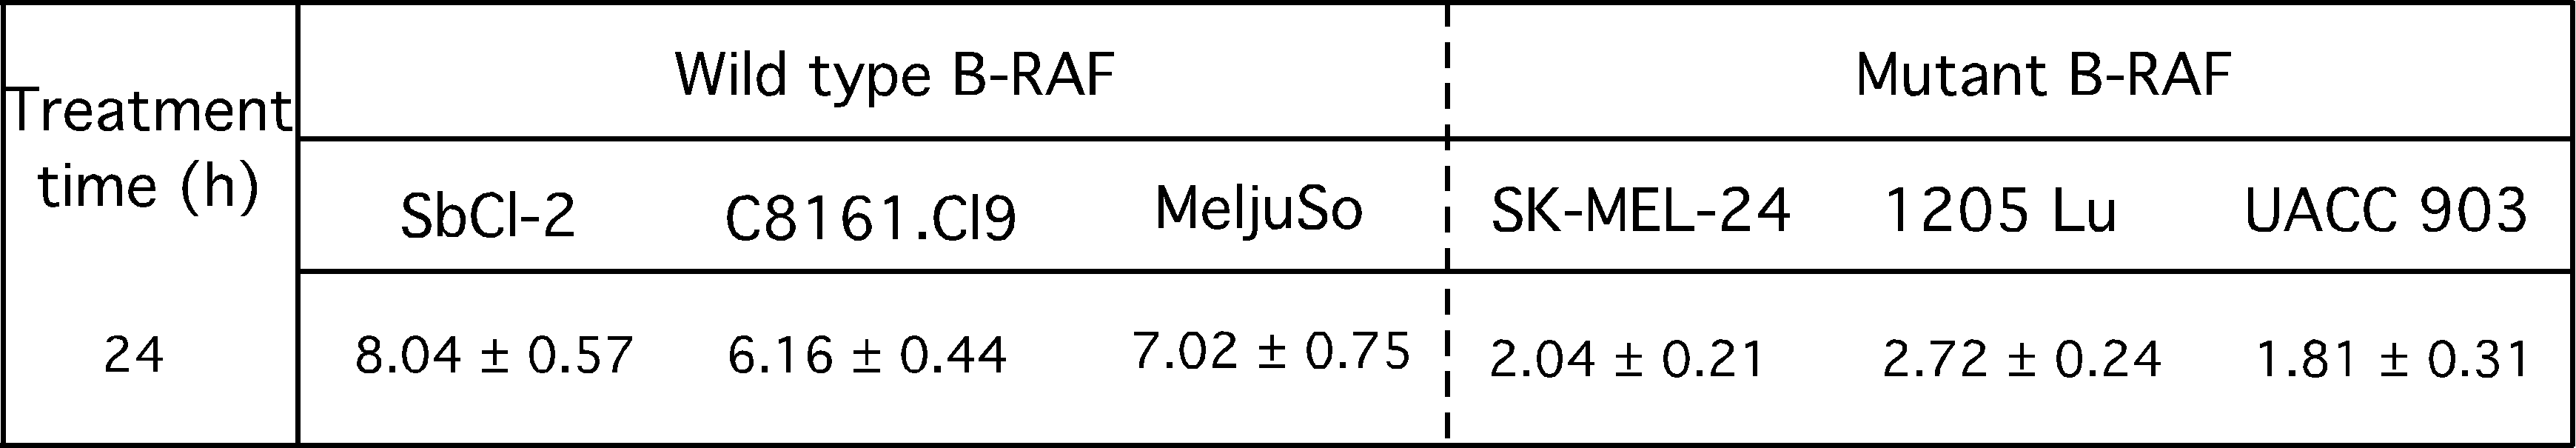


**Supplemental Table S3.** Efficacy of Nanolipolee-007 for killing wild type B-RAF containing melanoma cell lines SbCl2, C8161.Cl9 and MelJuSo was examined by MTS assay and found to have IC50s ranging from 7-8 μmol/L compared to cell lines that contained V600EB-RAF (SK-Mel-24, 1205 Lu, UACC 903), having IC50s of 2-2.3 µmol/L.
