# Supplementary figures and images for: Nanolipolee-007, a Novel Nanoparticle-Based Drug Containing Leelamine for the Treatment of Melanoma
Source: Oxford University Press journal article supplement (doi:10.1158/1535-7163.mct-14-0357), 2014-08-01

Supplemental Figure S3


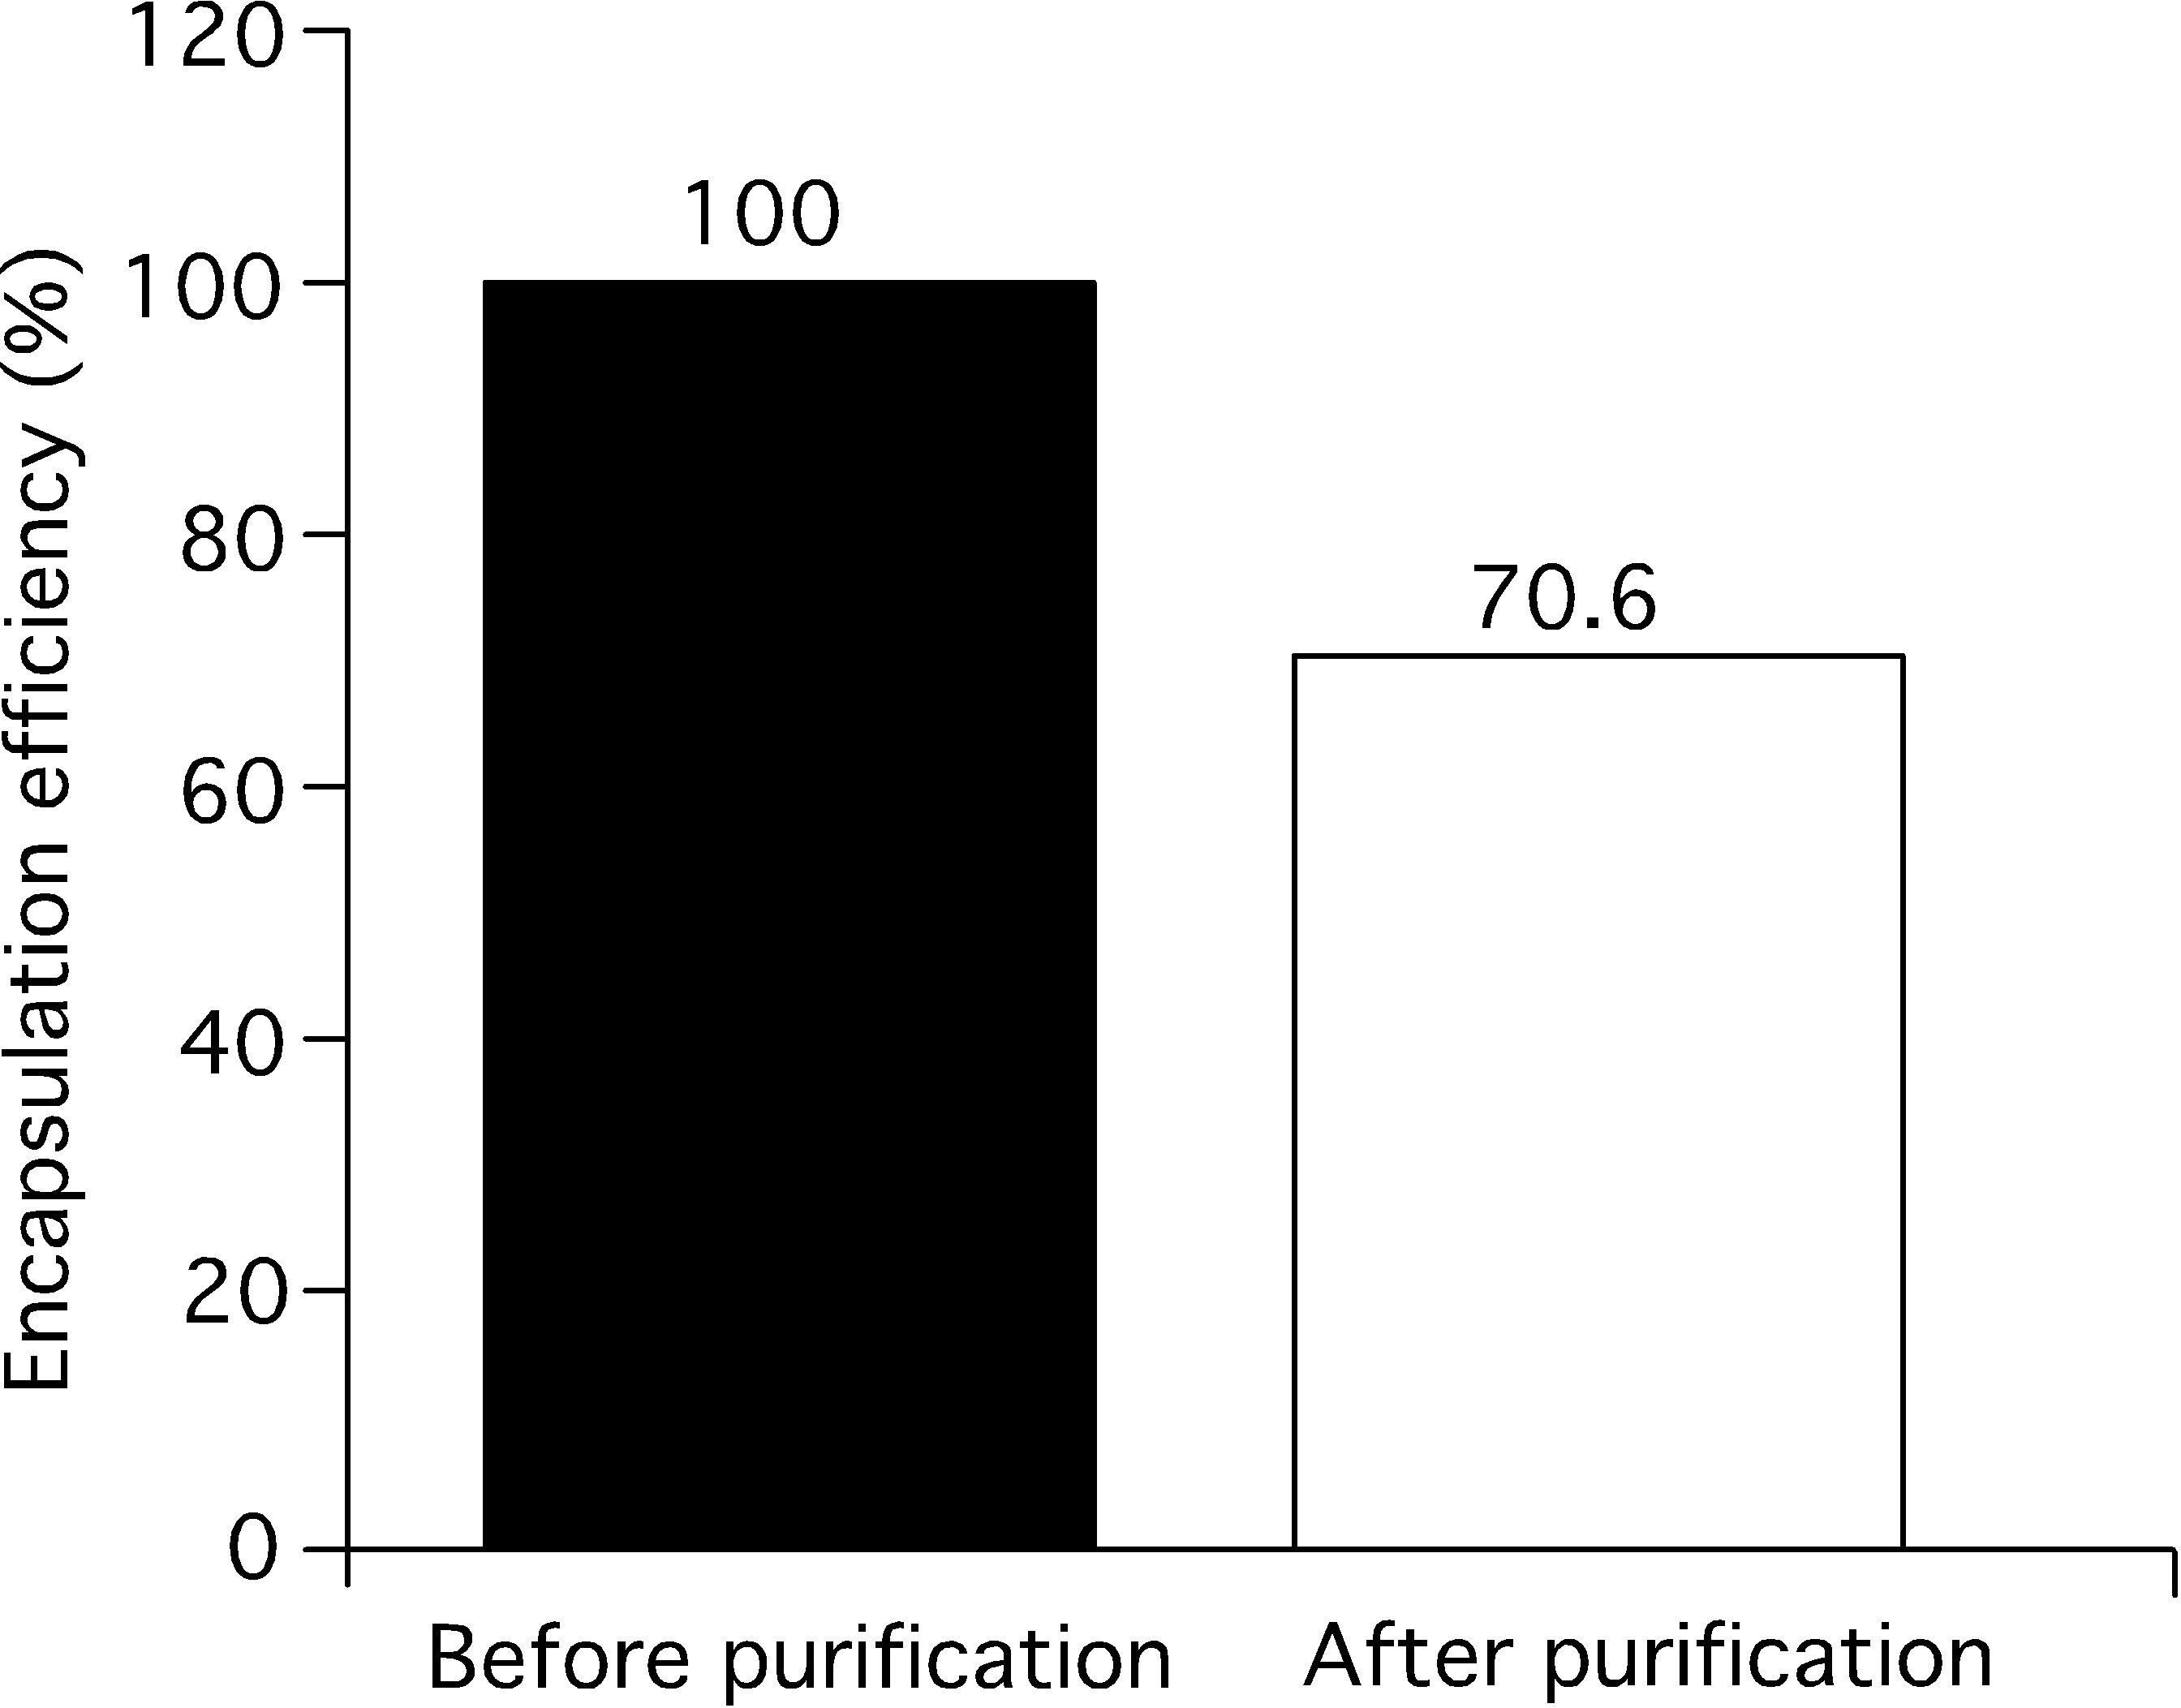

Supplement: 15357163mct140357-sup-130607_1_supp_2462645_n578kq.doc [file 15357163mct140357-sup-130607_1_supp_2462645_n578kq.doc]

Supplemental Figure S4


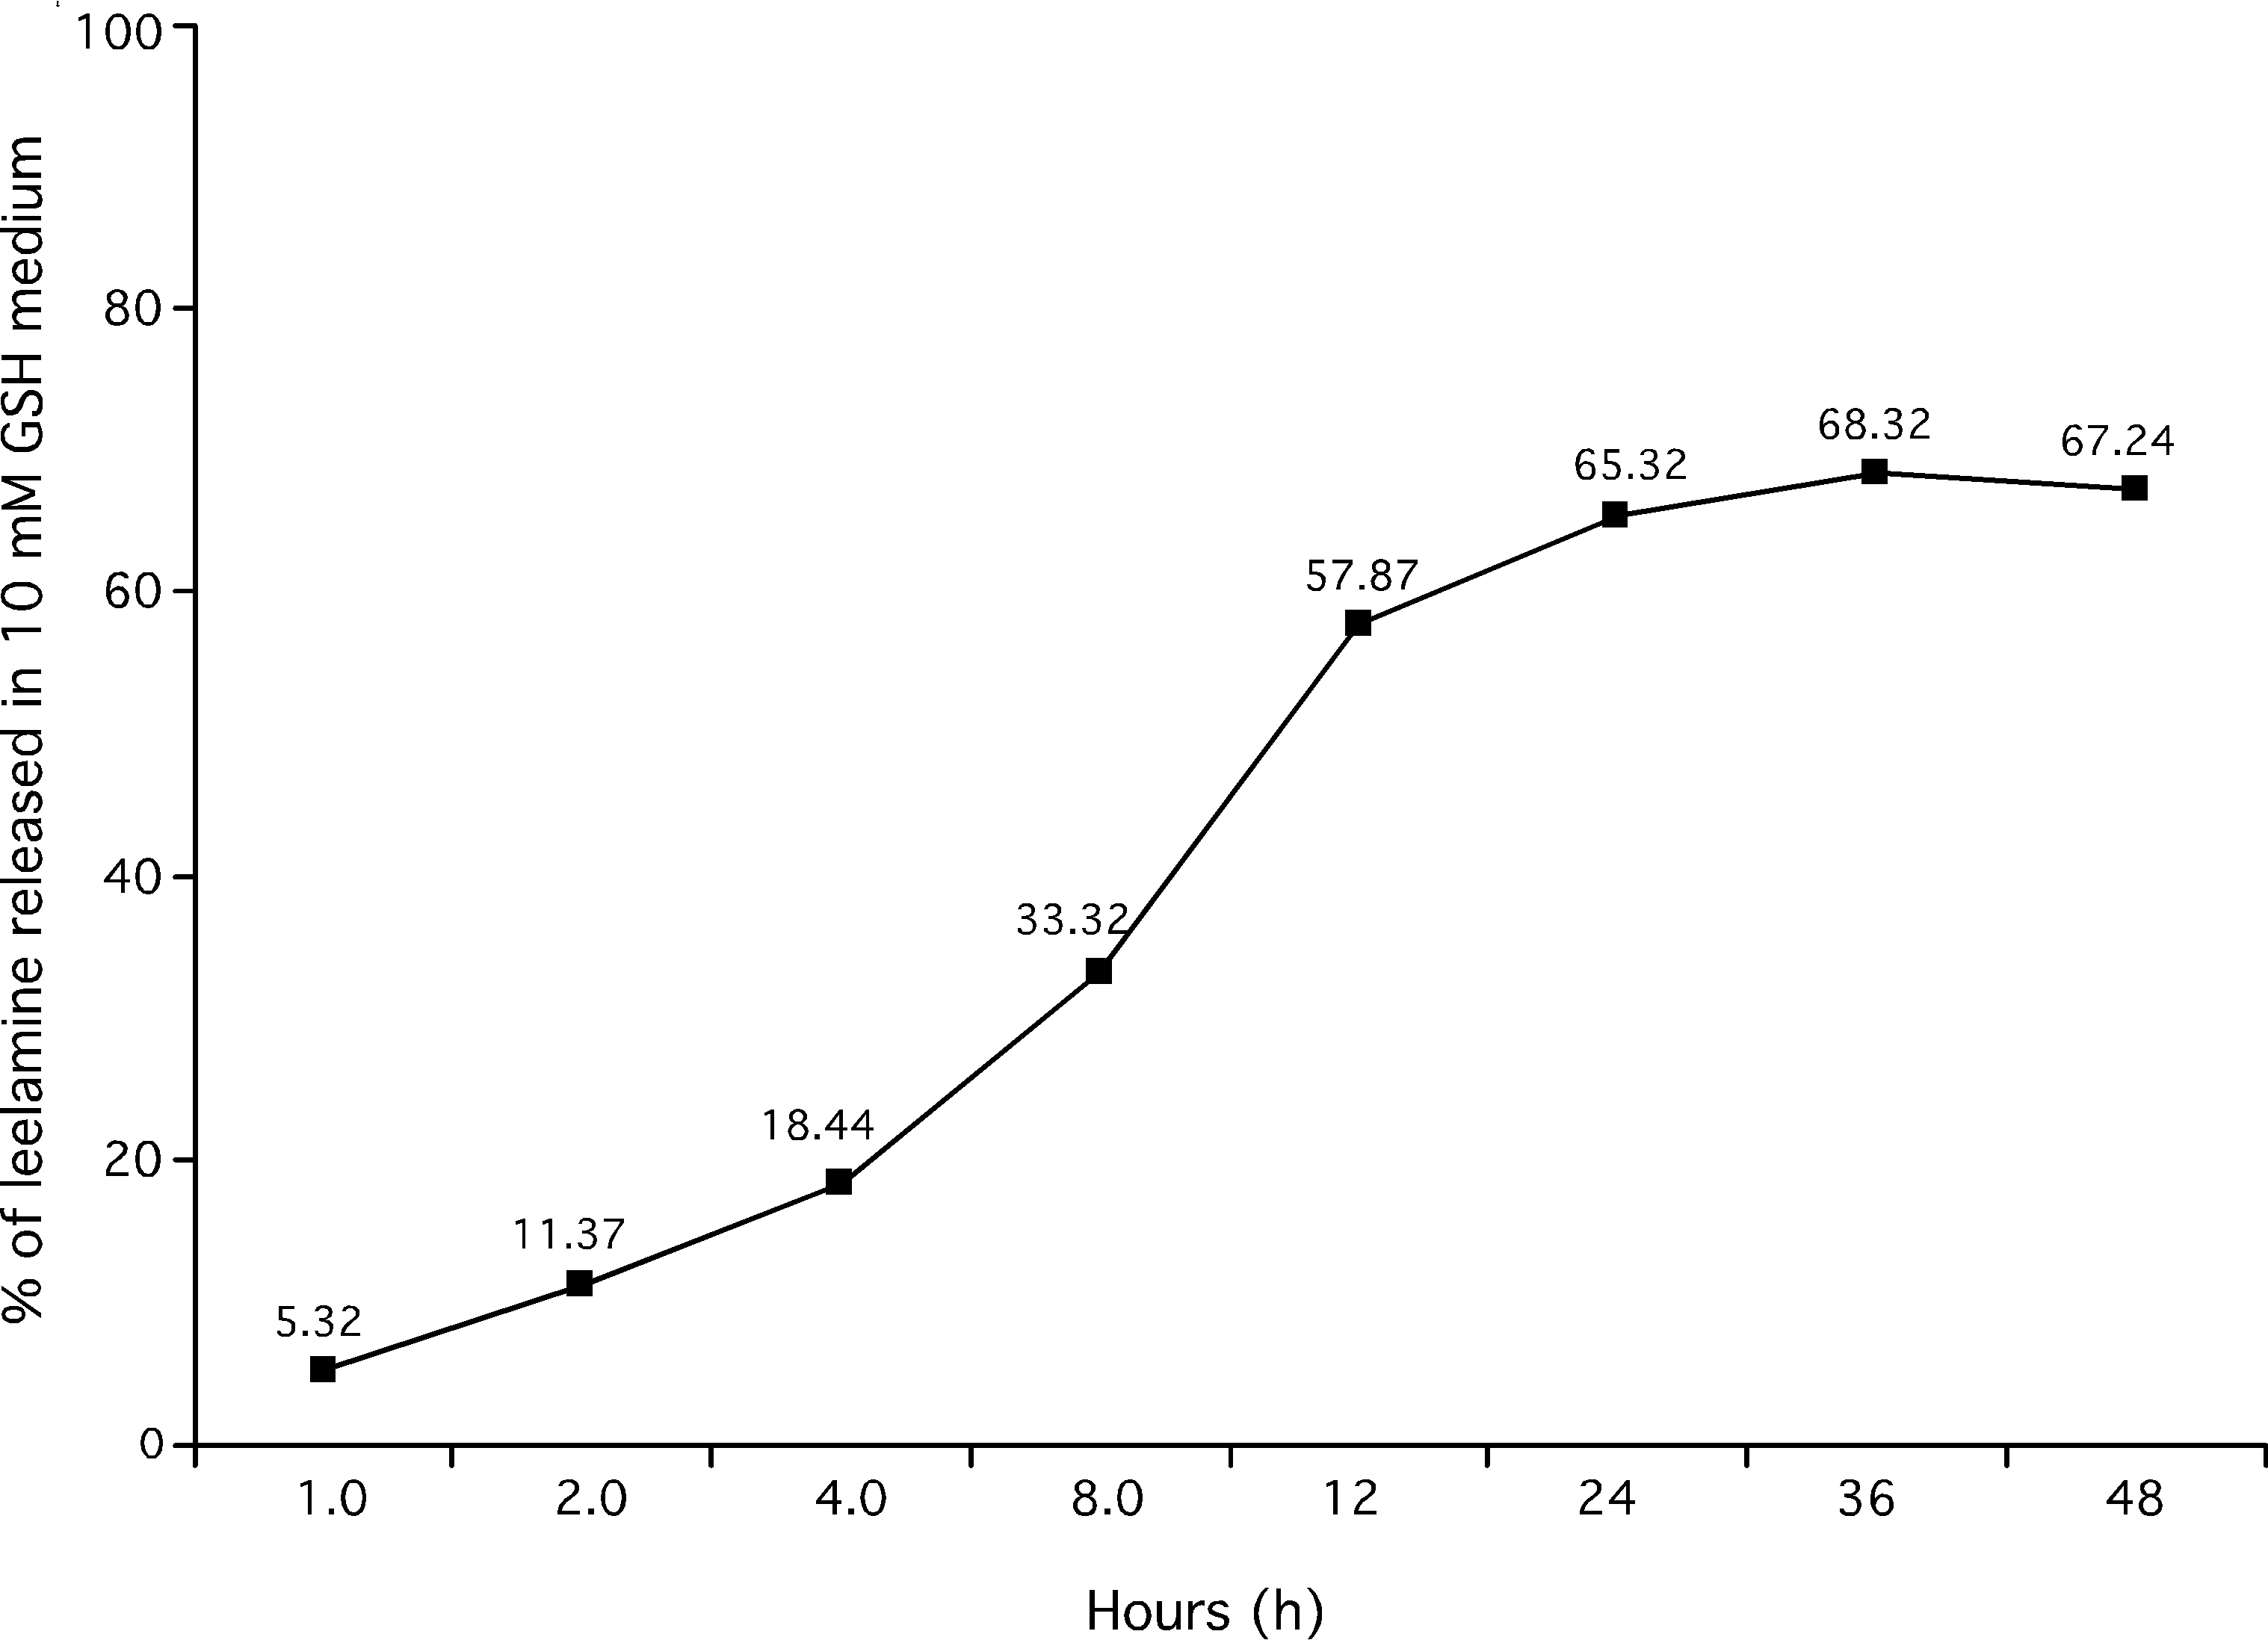

Supplement: 15357163mct140357-sup-130607_1_supp_2462646_n57kkq.doc [file 15357163mct140357-sup-130607_1_supp_2462646_n57kkq.doc]
